# Supplementary material for: Assessing Aflatoxin Knowledge, Perceptions, and related Practices, in a Rural Coastal Community: A Population-Based Cross-sectional Survey
Source: Research Square preprint supplement (doi:10.21203/rs.3.rs-8785894/v1), 2026-02-19
Supplement: Supplementary file 1 [file 09ed07376aa1b2c18dd38616.docx]

**CLINICAL RESEARCH UNIT: KALOLENI CANCER SURVEY**

**ALL HOUSEHOLDS**

1. **FOR THE SECTIONS THAT FOLLOW THE KEY RESPONDENTS ARE ALL HOUSEHOLD HEADS**

**DEMOGRAPHIC INFORMATION, PAST MEDICAL HISTORY AND OCCUPATIONAL HISTORY QUESTIONS**

| **Education and work** | 1A. Have you ever attended school?   1. Yes 2. No   1B. If yes, what was the highest level of education achieved?   1. Primary 2. Secondary 3. Tertiary 4. What is your current occupation? 5. Employed worker 6. Casual worker 7. Trader 8. Farmer 9. Housewife 10. Other |
| --- | --- |
| **Past medical history** | 1. In the last 12 months, how many times have you visited the hospital/clinic/dispensary for medical attention?    1. Yes    2. No   4A. Have you had any blood work done in the recent past?  Yes  No  4B. If yes, please specify:   1. Type of test_____________________ 2. Location of test_________________ 3. Reason for test__________________ |
| **Occupational history** | 5A. At your place of work/home, are you exposed to the following?   |  | Yes  No | | --- | --- | | 1. Asbestos |  | | 1. Radon |  | | 1. Ionising radiation |  | | 1. Soot |  | | 1. Toxic chemicals |  | | 1. Second-hand smoke |  | | 1. Pesticides |  | | 1. Other |  |   5B. If yes, please specify__ |

**AFLATOXIN KAP QUESTIONS**

| 1. How often do you consume Ugali (maize meal) per week? 2. >3x/week 3. <3x/week 4. 3× week | |
| --- | --- |
| 1. Is the maize meal you consume locally farmed and stored? 2. Yes 3. No 4. I don’t know | |
| 1. Is the maize meal you consume prepacked, or you mill it yourself? 2. Pre- Packed 3. Mill it locally | |
| 9A. Have you heard of Aflatoxin?   1. Yes 2. No 3. I don’t know | 9B. If Yes, what food stuffs are contaminated by aflatoxin. *tick all that apply:*   1. Maize 2. Wheat 3. Potatoes 4. Milk 5. I don’t know |
| 1. Do you know the signs of aflatoxin contamination in maize? *tick all that apply:*  |  | 1. Yes 2. No | | --- | --- | | 1. Discolouration |  | | 1. Mouldiness and wetness |  | | 1. Presence of insects |  | | 1. Mouldy smell |  | | 1. None of the Above |  | | 1. I don’t know |  | | |
| 1. Do you know what causes contamination of maize with aflatoxin?  |  | - 1. Yes   2. No | | --- | --- | | 1. Poorly dried or wet maize |  | | 1. Poor storage of maize |  | | 1. Drying maize on the ground |  | | 1. Shelling wet maize |  | | 1. All the above |  | | 1. I don’t know |  | | |
| 1. Do you think aflatoxin can be transferred through breast milk and contaminated chicken meat? 2. Yes 3. No 4. I don’t know | |
| 13A. Do you know any health effects of aflatoxin exposure?  1.Yes  2. No  3. I don’t know  13B. If yes, tick all that apply:   1. Stunting in children 2. Immunity suppression 3. Low productivity in livestock 4. Liver cirrhosis (Liver cancer) 5. Loss of income 6. Death | |

| 14A. Is aflatoxin a factor you consider while purchasing maize flour?   1. Yes 2. No | 14B. If yes, how do you determine that your flour is aflatoxin safe?   1. Rely on word of mouth from experts 2. Communication on packaging 3. Communication from media outlets |
| --- | --- |
| 1. Do you think Aflatoxin are destroyed through processes like cooking, boiling or baking? 2. Yes 3. No 4. I don’t know | |
| 16A. Do you know any Kenyan maize brands that are aflatoxin safe?   1. Yes 2. No | 16B. If yes, which brand(s) __________, _____________, ______________ |
| 1. What do you think should be done to create more awareness around aflatoxin safe maize flour? 2. Advocacy 3. Communication- radio, TV, billboards 4. Endorsement by medical experts 5. Other ______________________ | |
